# Supplementary material for: Comparative genomics reveals multiple pathways to mutualism for tick-borne pathogens
Source: PubMed Central journal article supplement (PMC4930560; doi:10.1186/s12864-016-2744-9), 2016-07-02
Supplement: 12864_2016_2744_MOESM1_ESM.pdf [file 12864_2016_2744_MOESM1_ESM.pdf]

**Table S1. Organisms and their protein sequence files in the current study.**

| Organism Number <sup>2</sup> | Species                                             | Protein Sequences File                 | Number of Proteins | Vector |
|------------------------------|-----------------------------------------------------|----------------------------------------|--------------------|--------|
| 5                            | <i>Anaplasma centrale</i> str. Israel               | GCA_000024505.1_ASM2450v1_protein.faa  | 925                | Tick   |
| 4                            | <i>Anaplasma marginale</i> str. Florida             | GCA_000020305.1_ASM2030v1_protein.faa  | 942                | Tick   |
| 0                            | <i>Anaplasma marginale</i> str. St. Maries          | GCA_000011945.1_ASM1194v1_protein.faa  | 949                | Tick   |
| 2                            | <i>Anaplasma phagocytophilum</i> str. HZ            | GCA_000013125.1_ASM1312v1_protein.faa  | 1352               | Tick   |
| 9                            | <i>Anaplasma phagocytophilum</i> str. HZ2           | GCA_000439755.1_ASM43975v1_protein.faa | 1247               | Tick   |
| 10                           | <i>Anaplasma phagocytophilum</i> str. JM            | GCA_000439775.1_ASM43977v1_protein.faa | 1256               | Tick   |
| 55                           | <i>Bartonella clarridgeiae</i> 73                   | NC_014932.faa                          | 1323               | Fleas  |
| 54                           | <i>Bartonella grahamii</i> as4aup                   | NC_012846.faa                          | 1737               | Fleas  |
| 25                           | <i>Bartonella henselae</i> str. Houston-1           | NC_005956.faa                          | 1488               | Fleas  |
| 91                           | <i>Bartonella quintana</i> RM-11                    | NC_018533.faa                          | 1203               | Lice   |
| 24                           | <i>Bartonella quintana</i> str. Toulouse            | NC_005955.faa                          | 1142               | Lice   |
| 44                           | <i>Bartonella tribocorum</i> CIP 105476             | NC_010161.faa                          | 2069               | Fleas  |
| 93                           | <i>Borrelia afzelii</i> HLJ01                       | NC_018887.faa                          | 892                | Tick   |
| 32                           | <i>Borrelia afzelii</i> PKo (FLI) <sup>1</sup>      | NC_008277.faa                          | 848                | Tick   |
| 84                           | <i>Borrelia afzelii</i> PKo (Maryland) <sup>1</sup> | NC_017238.faa                          | 824                | Tick   |
| 57                           | <i>Borrelia bissettii</i> DN127                     | NC_015921.faa                          | 816                | Tick   |
| 21                           | <i>Borrelia burgdorferi</i> B31                     | NC_001318.faa                          | 797                | Tick   |
| 98                           | <i>Borrelia burgdorferi</i> CA382                   | NC_022048.faa                          | 819                | Tick   |
| 85                           | <i>Borrelia burgdorferi</i> JD1                     | NC_017403.faa                          | 823                | Tick   |
| 86                           | <i>Borrelia burgdorferi</i> N40                     | NC_017418.faa                          | 809                | Tick   |
| 52                           | <i>Borrelia burgdorferi</i> ZS7                     | NC_011728.faa                          | 808                | Tick   |
| 90                           | <i>Borrelia crocidurae</i> str. Achema              | NC_017808.faa                          | 864                | Tick   |
| 48                           | <i>Borrelia duttonii</i> Ly                         | NC_011229.faa                          | 820                | Tick   |
| 89                           | <i>Borrelia garinii</i> BgVir                       | NC_017717.faa                          | 826                | Tick   |
| 92                           | <i>Borrelia garinii</i> NMJW1                       | NC_018747.faa                          | 813                | Tick   |
| 46                           | <i>Borrelia hermsii</i> HS1                         | NC_010673.faa                          | 819                | Tick   |
| 99                           | <i>Borrelia miyamotoi</i> LB-2001                   | NC_022079.faa                          | 808                | Tick   |
| 49                           | <i>Borrelia recurrentis</i> A1                      | NC_011244.faa                          | 800                | Lice   |
| 35                           | <i>Borrelia turicatae</i> 91E135                    | NC_008710.faa                          | 818                | Tick   |
| 100                          | <i>Borrelia valaisiana</i> VS116                    | NZ_ABCY02000001.faa                    | 832                | Tick   |
| 50                           | <i>Coxiella burnetii</i> CbuG_Q212                  | NC_011527.faa                          | 1864               | Tick   |

|    |                                                            |                                        |      |      |
|----|------------------------------------------------------------|----------------------------------------|------|------|
| 51 | <i>Coxiella burnetii</i> CbuK_Q154                         | NC_011528.faa                          | 1898 | Tick |
| 37 | <i>Coxiella burnetii</i> Dugway 5J108-111                  | NC_009727.faa                          | 1993 | Tick |
| 43 | <i>Coxiella burnetii</i> RSA 331                           | NC_010117.faa                          | 1930 | Tick |
| 22 | <i>Coxiella burnetii</i> RSA 493                           | NC_002971.faa                          | 1823 | Tick |
| 1  | <i>Ehrlichia canis</i> str. Jake                           | GCA_000012565.1_ASM1256v1_protein.faa  | 925  | Tick |
| 3  | <i>Ehrlichia chaffeensis</i> str. Arkansas                 | GCA_000013145.1_ASM1314v1_protein.faa  | 1105 | Tick |
| 12 | <i>Ehrlichia chaffeensis</i> str. Heartland                | GCA_000632815.1_ASM63281v1_protein.faa | 970  | Tick |
| 14 | <i>Ehrlichia chaffeensis</i> str. Jax                      | GCA_000632865.1_ASM63286v1_protein.faa | 989  | Tick |
| 15 | <i>Ehrlichia chaffeensis</i> str. Liberty                  | GCA_000632885.1_ASM63288v1_protein.faa | 989  | Tick |
| 16 | <i>Ehrlichia chaffeensis</i> str. Osceola                  | GCA_000632905.1_ASM63290v1_protein.faa | 988  | Tick |
| 17 | <i>Ehrlichia chaffeensis</i> str. Saint Vincent            | GCA_000632925.1_ASM63292v1_protein.faa | 973  | Tick |
| 18 | <i>Ehrlichia chaffeensis</i> str. Wakulla                  | GCA_000632945.1_ASM63294v1_protein.faa | 980  | Tick |
| 19 | <i>Ehrlichia chaffeensis</i> str. West Paces               | GCA_000632965.1_ASM63296v1_protein.faa | 962  | Tick |
| 11 | <i>Ehrlichia muris</i> AS145                               | GCA_000508225.1_ASM50822v1_protein.faa | 904  | Tick |
| 7  | <i>Ehrlichia ruminantium</i> str. Gardel                   | GCA_000050405.1_ASM5040v1_protein.faa  | 950  | Tick |
| 6  | <i>Ehrlichia ruminantium</i> str. Welgevonden              | GCA_000026005.1_ASM2600v1_protein.faa  | 888  | Tick |
| 8  | <i>Ehrlichia ruminantium</i> str. Welgevonden              | GCA_000050425.1_ASM5042v1_protein.faa  | 958  | Tick |
| 13 | <i>Ehrlichia</i> sp. HF                                    | GCA_000632845.1_ASM63284v1_protein.faa | 946  | Tick |
| 94 | <i>Francisella tularensis</i> subsp. holarctica F92        | NC_019537.faa                          | 1842 | Tick |
| 95 | <i>Francisella tularensis</i> subsp. holarctica FSC200     | NC_019551.faa                          | 1438 | Tick |
| 38 | <i>Francisella tularensis</i> subsp. holarctica FTNF002-00 | NC_009749.faa                          | 1581 | Tick |
| 29 | <i>Francisella tularensis</i> subsp. holarctica LVS        | NC_007880.faa                          | 1754 | Tick |
| 33 | <i>Francisella tularensis</i> subsp. holarctica OSU18      | NC_008369.faa                          | 1555 | Tick |
| 47 | <i>Francisella tularensis</i> subsp. mediasiatica FSC147   | NC_010677.faa                          | 1406 | Tick |
| 34 | <i>Francisella tularensis</i> subsp. novicida U112         | NC_008601.faa                          | 1719 | Tick |
| 31 | <i>Francisella tularensis</i> subsp. tularensis FSC198     | NC_008245.faa                          | 1605 | Tick |
| 87 | <i>Francisella tularensis</i> subsp.                       | NC_017453.faa                          | 1836 | Tick |

|     |                                                           |                 |      |       |
|-----|-----------------------------------------------------------|-----------------|------|-------|
|     | tularensis NE061598                                       |                 |      |       |
| 27  | <i>Francisella tularensis</i> subsp. tularensis SCHU S4   | NC_006570.faa   | 1556 | Tick  |
| 70  | <i>Francisella tularensis</i> subsp. tularensis TIO902    | NC_016937.faa   | 1544 | Tick  |
| 69  | <i>Francisella tularensis</i> subsp. tularensis TIGB03    | NC_016933.faa   | 1624 | Tick  |
| 36  | <i>Francisella tularensis</i> subsp. tularensis WY96-3418 | NC_009257.faa   | 1634 | Tick  |
| 53  | <i>Rickettsia africae</i> ESF-5                           | NC_012633.faa   | 1030 | Tick  |
| 80  | <i>Rickettsia australis</i> str. Cutlack                  | NC_017058.faa   | 1239 | Tick  |
| 41  | <i>Rickettsia bellii</i> OSU 85-389                       | NC_009883.faa   | 1475 | Tick  |
| 30  | <i>Rickettsia bellii</i> RML369-C                         | NC_007940.faa   | 1429 | Tick  |
| 66  | <i>Rickettsia canadensis</i> str. CA410                   | NC_016929.faa   | 1016 | Tick  |
| 39  | <i>Rickettsia canadensis</i> str. McKiel                  | NC_009879.faa   | 1089 | Tick  |
| 23  | <i>Rickettsia conorii</i> str. Malish 7                   | NC_003103.faa   | 1374 | Tick  |
| 28  | <i>Rickettsia felis</i> URRWXCal2                         | NC_007109.faa   | 1400 | Fleas |
| 56  | <i>Rickettsia heilongjiangensis</i> 054                   | NC_015866.faa   | 1297 | Tick  |
| 58  | <i>Rickettsia japonica</i> YH                             | NC_016050.faa   | 971  | Tick  |
| 42  | <i>Rickettsia massiliae</i> MTU5                          | NC_009900.faa   | 968  | Tick  |
| 68  | <i>Rickettsia massiliae</i> str. AZT80                    | NC_016931.faa   | 1195 | Tick  |
| 101 | <i>Rickettsia monacensis</i>                              | NZ_LN794217.faa | 1443 | Tick  |
| 72  | <i>Rickettsia montanensis</i> str. OSU 85-930             | NC_017043.faa   | 1217 | Tick  |
| 73  | <i>Rickettsia parkeri</i> str. Portsmouth                 | NC_017044.faa   | 1318 | Tick  |
| 67  | <i>Rickettsia philipii</i> str. 364D                      | NC_016930.faa   | 1344 | Tick  |
| 97  | <i>Rickettsia prowazekii</i> str. Breinl                  | NC_020993.faa   | 920  | Lice  |
| 78  | <i>Rickettsia prowazekii</i> str. BuV67-CWPP              | NC_017056.faa   | 843  | Lice  |
| 75  | <i>Rickettsia prowazekii</i> str. Chernikova              | NC_017049.faa   | 845  | Lice  |
| 77  | <i>Rickettsia prowazekii</i> str. Dachau                  | NC_017051.faa   | 839  | Lice  |
| 74  | <i>Rickettsia prowazekii</i> str. GvV257                  | NC_017048.faa   | 829  | Lice  |
| 76  | <i>Rickettsia prowazekii</i> str. Katsinyian              | NC_017050.faa   | 844  | Lice  |
| 20  | <i>Rickettsia prowazekii</i> str. Madrid E                | NC_000963.faa   | 843  | Lice  |

|    |                                                      |               |                |       |
|----|------------------------------------------------------|---------------|----------------|-------|
| 96 | <i>Rickettsia prowazekii</i> str. NMRC Madrid E      | NC_020992.faa | 938            | Lice  |
| 88 | <i>Rickettsia prowazekii</i> str. Rp22               | NC_017560.faa | 950            | Lice  |
| 79 | <i>Rickettsia prowazekii</i> str. RpGvF24            | NC_017057.faa | 834            | Lice  |
| 71 | <i>Rickettsia rhipicephali</i> str. 3-7-female6-CWPP | NC_017042.faa | 1252           | Tick  |
| 61 | <i>Rickettsia rickettsii</i> str. Arizona            | NC_016909.faa | 1343           | Tick  |
| 63 | <i>Rickettsia rickettsii</i> str. Brazil             | NC_016913.faa | 1332           | Tick  |
| 60 | <i>Rickettsia rickettsii</i> str. Colombia           | NC_016908.faa | 1350           | Tick  |
| 62 | <i>Rickettsia rickettsii</i> str. Hauke              | NC_016911.faa | 1340           | Tick  |
| 64 | <i>Rickettsia rickettsii</i> str. Hino               | NC_016914.faa | 1335           | Tick  |
| 65 | <i>Rickettsia rickettsii</i> str. Hlp#2              | NC_016915.faa | 1308           | Tick  |
| 45 | <i>Rickettsia rickettsii</i> str. Iowa               | NC_010263.faa | 1382           | Tick  |
| 40 | <i>Rickettsia rickettsii</i> str. 'Sheila Smith'     | NC_009882.faa | 1343           | Tick  |
| 59 | <i>Rickettsia slovaca</i> 13-B                       | NC_016639.faa | 1112           | Tick  |
| 82 | <i>Rickettsia slovaca</i> str. D-CWPP                | NC_017065.faa | 1347           | Tick  |
| 81 | <i>Rickettsia typhi</i> str. B9991CWPP               | NC_017062.faa | 839            | Fleas |
| 83 | <i>Rickettsia typhi</i> str. TH1527                  | NC_017066.faa | 838            | Fleas |
| 26 | <i>Rickettsia typhi</i> str. Wilmington              | NC_006142.faa | 837            | Fleas |
|    | <b>Total: 102 organisms</b>                          |               | <b>120,046</b> |       |

<sup>1</sup> *FLI* and *Maryland* are designations in the KEGG database for the two *Borrelia afzelii* spp.

<sup>2</sup> Network number corresponds to the organism number in the network in Figure 1.
